# Supplementary material
Source: Elsevier journal article supplement (https://comptes-rendus.academie-sciences.fr/chimie/article/10.1016/j.crci.2007.02.002/file/attach/mmc4.pdf)
Supplement: mmc4 [file mmc4.pdf]

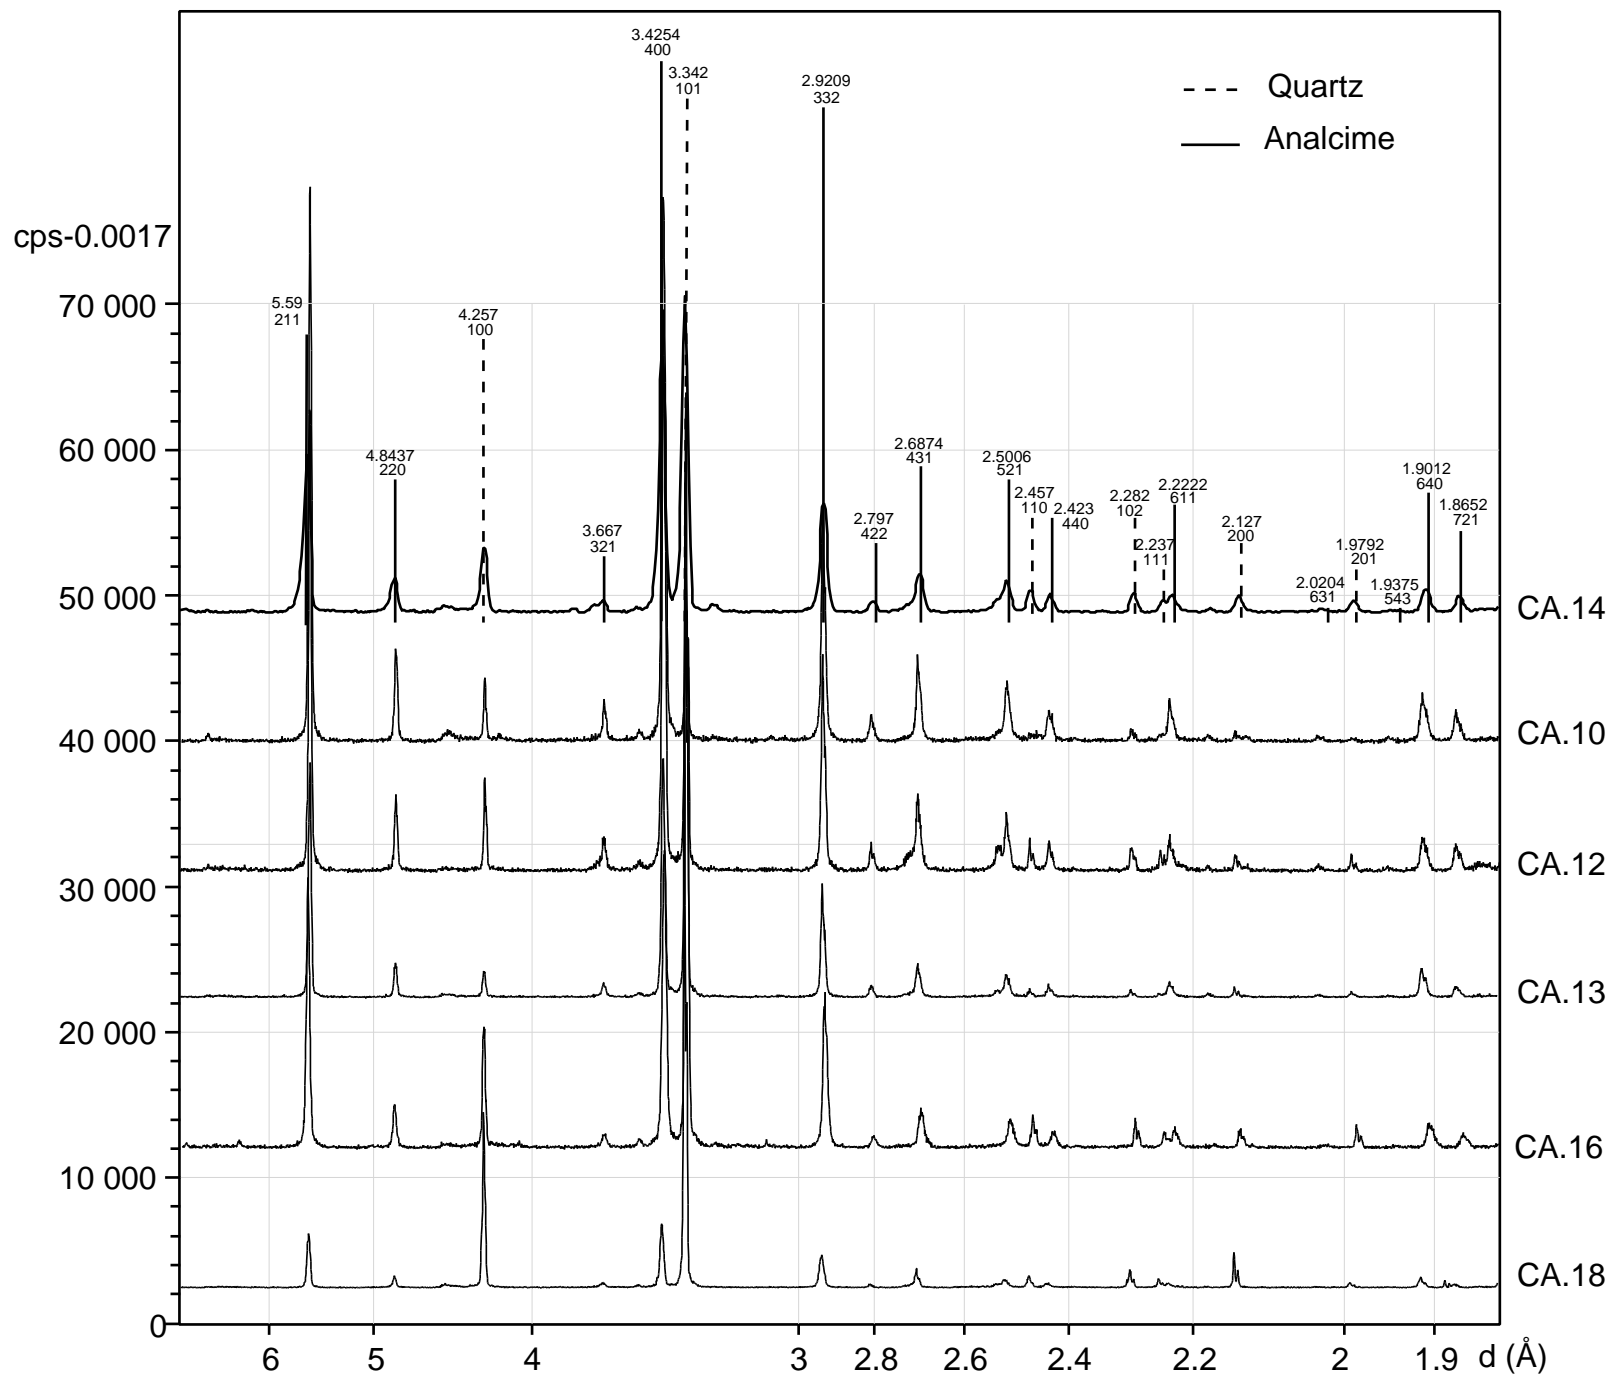

Figure S-3.b : Diffractogrammes DRX des échantillons contenant essentiellement de l'analcime et du quartz (suite).
